# Supplementary material
Source: PubMed Central journal article supplement (PMC3898604)
Supplement: mmc2.pdf [file mmc2.pdf]

# Structural Analysis Uncovers Lipid-Binding Properties of Notch Ligands

Chandramouli R. Chillakuri,<sup>1,4</sup> Devon Sheppard,<sup>2,4</sup> Ma. Xenia G. Ilagan,<sup>3</sup> Laurie R. Holt,<sup>1</sup> Felicity Abbott,<sup>1</sup> Shaoyan Liang,<sup>1</sup> Raphael Kopan,<sup>3</sup> Penny A. Handford,<sup>1,\*</sup> and Susan M. Lea<sup>2,\*</sup>

<sup>1</sup>Department of Biochemistry, University of Oxford, South Parks Road, Oxford OX1 3QU, UK

<sup>2</sup>Sir William Dunn School of Pathology, University of Oxford, South Parks Road, Oxford OX1 3RE, UK

<sup>3</sup>Department of Developmental Biology and Department of Medicine, Washington University School of Medicine, Euclid Avenue, St. Louis, MO 63110, USA

<sup>4</sup>These authors contributed equally to this work

\*Correspondence: penny.handford@bioch.ox.ac.uk (P.A.H.), susan.lea@path.ox.ac.uk (S.M.L.)

<http://dx.doi.org/10.1016/j.celrep.2013.10.029>

This is an open-access article distributed under the terms of the Creative Commons Attribution License, which permits unrestricted use, distribution, and reproduction in any medium, provided the original author and source are credited.

## SUMMARY

The Notch pathway is a core cell-cell signaling system in metazoan organisms with key roles in cell-fate determination, stem cell maintenance, immune system activation, and angiogenesis. Signals are initiated by extracellular interactions of the Notch receptor with Delta/Serrate/Lag-2 (DSL) ligands, whose structure is highly conserved throughout evolution. To date, no structure or activity has been associated with the extreme N termini of the ligands, even though numerous mutations in this region of Jagged-1 ligand lead to human disease. Here, we demonstrate that the N terminus of human Jagged-1 is a C2 phospholipid recognition domain that binds phospholipid bilayers in a calcium-dependent fashion. Furthermore, we show that this activity is shared by a member of the other class of Notch ligands, human Delta-like-1, and the evolutionary distant *Drosophila* Serrate. Targeted mutagenesis of Jagged-1 C2 domain residues implicated in calcium-dependent phospholipid binding leaves Notch interactions intact but can reduce Notch activation. These results reveal an important and previously unsuspected role for phospholipid recognition in control of this key signaling system.

## INTRODUCTION

The Notch signaling system has a crucial impact on the development and homeostasis of most tissues and organs (Harper et al., 2003). Dysregulation of the pathway results in a number of inherited and acquired disorders, including various cancers, and thus it is a key target for therapeutic intervention (Groth and Fortini, 2012). Despite the importance of this pathway, little is known about the structural basis of Notch receptor-ligand interactions and the molecular mechanisms that transduce this recognition event into signal activation (Bray, 2006; Chillakuri et al., 2012).

The Notch receptor exists as a heterodimeric transmembrane protein that upon binding to ligands from Jagged/Serrate or Delta-like families results in the metalloprotease-cleaved Notch extracellular domain. A final intramembrane cleavage by gamma secretase releases the intracellular domain of Notch (NICD), which translocates to the nucleus and binds to a transcription factor of the CBF1, Suppressor of Hairless, Lag-1 (CSL) family. This complex, together with the coactivator MAML, relieves repression and activates genes of the *Hes* and *Hey* repressor families (Gordon et al., 2008). Interactions with the Notch receptor can activate or inhibit Notch signaling, depending on whether ligands are presented to Notch on adjacent cells (*trans*) or on the same cell (*cis*) (Sprinzak et al., 2010). O-glycosylation of Notch also plays an important role in regulating Notch signaling in a ligand-specific manner through the action of Fringe glycosyltransferases (Stanley and Okajima, 2010).

Direct contact between the epidermal growth factor (EGF)-like domain EGF12 of Notch and the Delta/Serrate/Lag-2 (DSL) domain, approximately 150 residues from the N terminus of the ligands, confers specificity to the interaction (Cordle et al., 2008a, 2008b; Whiteman et al., 2013). The role of the very N-terminal portion of the ligands is unknown, although its importance is implied by the fact that all Notch ligands through evolution position the DSL domain C-terminal to this region, and deletion of this region in a *Caenorhabditis elegans* ligand, LAG-2, was shown to abolish its function (Henderson et al., 1997).

## RESULTS

We expressed and solved the structure of a Notch ligand fragment consisting of the full N-terminal extension, the Notch-binding DSL domain, and the three adjacent EGF domains from human Jagged-1 (J-1<sub>N-EGF3</sub>) (Figure 1A; Table 1). Our structure demonstrates that the N-terminal portion of Jagged-1 folds as a C2-phospholipid-recognition domain with strong structural, but not sequence, homology to the Munc13 C2B domain (root-mean-square deviation [rmsd] 2.7 Å versus Protein Data Bank 3KWT, 10% sequence identity; Figure 1B; Cho and Stahelin, 2006; Shin et al., 2010). The C2 domain packs closely on top of the Notch-binding DSL domain without altering the structure

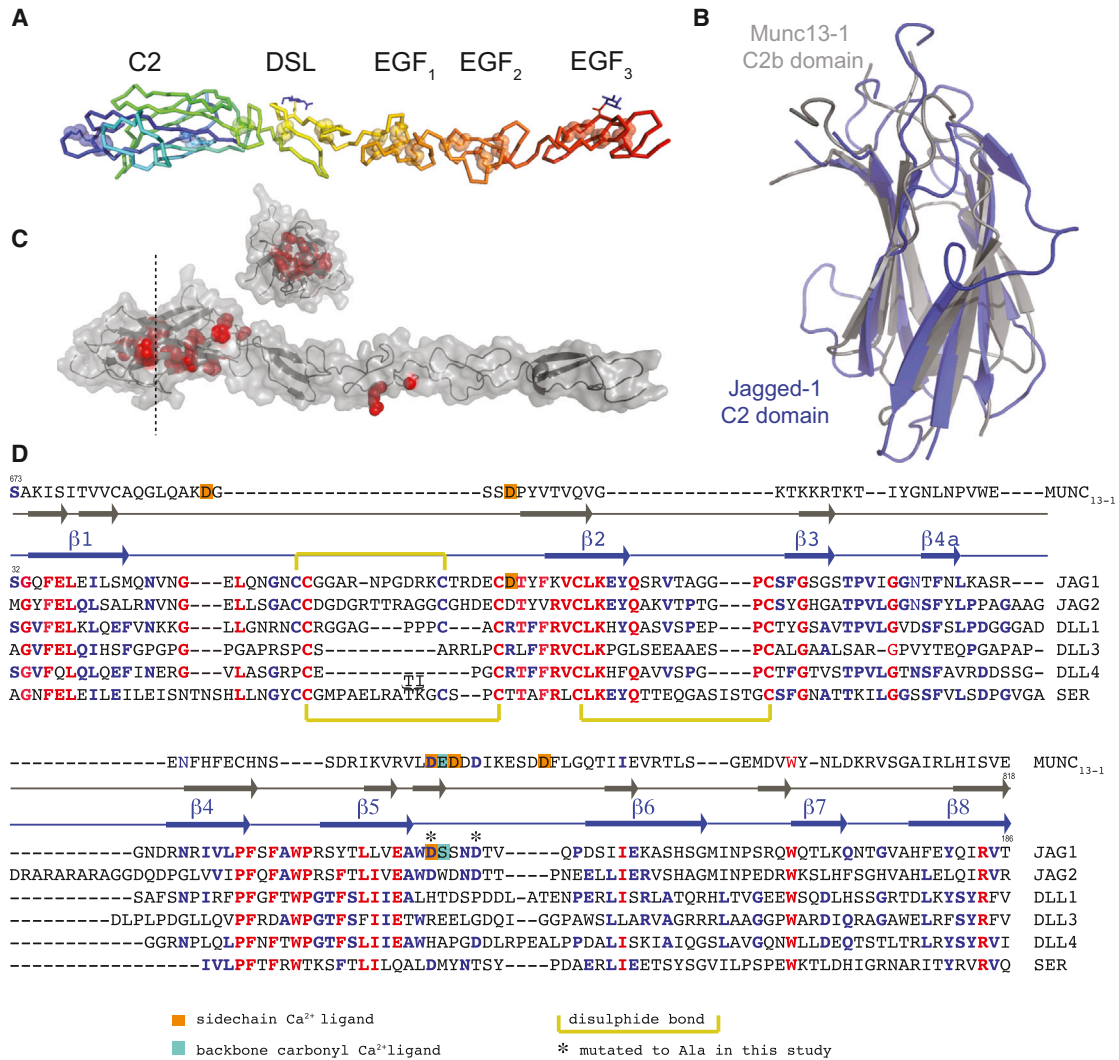

**Figure 1. The Structure of Jagged1<sub>N-EGF3</sub> Reveals a C2 Domain N Terminal to the DSL Motif**

(A) The structure of J-1<sub>N-EGF3</sub> is shown in ribbon representation, with colors ranging from blue at the N terminus to red at the C terminus. Disulphide bonds are shown as sticks within semitransparent spheres, and the two glycans are shown as blue sticks.  
 (B) Overlay of the N-terminal C2 domain of J-1<sub>N-EGF3</sub> (blue) on the Munc13-1 C2b domain (gray).  
 (C) Alagille-syndrome-associated missense mutations that affect the C2 domain (red) are mapped onto the structure of J-1<sub>N-EGF3</sub> (gray cartoon and solid surface) and are located within the core of the domain (inset panel shows section at the level indicated by dotted line).  
 (D) Structure-based sequence alignment of the Munc13-1 C2b domain and the N-terminal domains of Notch ligands. Most sequences associated with β strands contain some regions of absolute (red) or high (blue) sequence homology, whereas loop regions are more variable. Residues that coordinate the Ca<sup>2+</sup> ion within the Munc13 domain are indicated, as are candidate Ca<sup>2+</sup> ligand residues in J-1 mutated in this study (\*).  
 See also Figures S1 and S2.

of the DSL-EGF<sub>1-3</sub> portion of the construct in comparison with our earlier structure for this region in isolation (Figure S1), and therefore extends the near-linear domain organization (Cordle et al., 2008a). Many missense mutations that affect this domain of J-1 cause Alagille syndrome, a developmental disorder that is usually associated with J-1 haploinsufficiency, and mapping these mutations onto our structure suggests that they destabilize the hydrophobic core and prevent correct folding of the C2 domain (Figure 1C; Penton et al., 2012). This is supported by our attempts to express J-1<sub>N-EGF3</sub> constructs containing these Alagille-syndrome-associated substitutions, which largely re-

sulted in no or little protein secretion (Figure S2), suggesting that these mutations lead to misfolding of the C2 domain and endoplasmic reticulum retention of J-1.

Sequence alignments with other Notch ligands (Figure 1D) suggest that the C2 domain is present in all mammalian Notch ligands, with conserved residues mapping to those that play key structural roles, and residues exposed on the surface of the domain being more variable. Even evolutionarily distant Notch ligands such as *Drosophila* Serrate and the *C. elegans* LAG-2 retain N-terminal regions of similar lengths, and their sequences are compatible with a C2 fold. These data suggest

**Table 1. Crystallographic Data Collection and Refinement Statistics**

|                                                               | Apo                       | Ca <sup>2+</sup>          | Ca <sup>2+</sup>          |
|---------------------------------------------------------------|---------------------------|---------------------------|---------------------------|
| Wavelength (Å)                                                | 0.97625                   | 0.976                     | 0.976                     |
| Space group                                                   | P 1                       | P 1                       | P 1                       |
| Cell dimensions                                               |                           |                           |                           |
| a, b, c (Å)                                                   | 56.93, 59.84,<br>62.94    | 55.98, 60.25,<br>62.65    | 55.95, 60.56,<br>63.03    |
| α, β, γ (°)                                                   | 95.04, 101.90,<br>98.70   | 92.59, 104.44,<br>106.67  | 92.89, 104.95,<br>105.92  |
| Resolution (Å)                                                | 61.12–2.50<br>(2.62–2.50) | 60.19–2.38<br>(2.40–2.38) | 60.38–2.84<br>(3.01–2.84) |
| Redundancy                                                    | 1.84 (1.79)               | 1.77 (1.78)               | 2.45 (2.41)               |
| Completeness (%)                                              | 82.9 (38.3) <sup>a</sup>  | 97.3 (96.2)               | 98.2 (97.8)               |
| I/σ(I)                                                        | 3.7 (0.7)                 | 4.3 (1.6)                 | 11.3 (1.8)                |
| Rmerge (%)                                                    | 11.8 (54.2) <sup>a</sup>  | 14.4 (46.0)               | 15.9 (45.5)               |
| Refinement statistics                                         |                           |                           |                           |
| Resolution limit (Å)                                          | 2.50                      | 2.38                      | 2.84                      |
| Reflections                                                   | 22,816                    | 31,595                    | 17,666                    |
| R <sub>work</sub> /R <sub>free</sub> (%)                      | 20.4/24.6                 | 21.8/24.6                 | 19.6/24.9                 |
| Residues in allowed regions of Ramachandran plot (%)          | 99.6                      | 99.6                      | 100.0                     |
| Residues in most favored regions of Ramachandran plot (% , Å) | 95.1                      | 93.7                      | 92.1                      |
| Rmsd bond lengths (λ)                                         | 0.008                     | 0.01                      | 0.01                      |
| Rmsd bond angles                                              | 1.12                      | 1.19                      | 1.23                      |
| Mean B value (Å <sup>2</sup> )                                | 70.26                     | 43.98                     | 68.53                     |
| Protein                                                       | 70.03                     | 43.88                     | 68.34                     |
| Glycosylation                                                 | 95.54                     | 69.15                     | 94.36                     |
| Waters                                                        | 49.36                     | 35.45                     | 39.49                     |
| Ions                                                          |                           | 58.68                     | 54.47                     |

Values denoted in brackets refer to highest-resolution shell.

<sup>a</sup>Refinement of the structure was performed at 2.5 Å, at 2.8 Å.

Completeness (%) = 89%, and Rmerge (outer shell) = 30.0%.

an important role for the ligand C2 domain in the Notch signaling pathway, although the high level of variation in the loops connecting the key secondary structural elements also implies functional diversity. Since the strongest structural homology of the J-1 C2 domain is to calcium-dependent phospholipid-binding domains (e.g., the Munc13-1 C2b domain; Shin et al., 2010), we investigated whether J-1<sub>N-EGF3</sub> binds Ca<sup>2+</sup>. We first used a limited proteolysis assay, which showed that Ca<sup>2+</sup> (but not Mg<sup>2+</sup> or EDTA) protects the J-1<sub>N-EGF3</sub> fragment (but not a J-1 fragment lacking the C2 domain) from tryptic digestion. This suggests the presence of previously unrecognized Ca<sup>2+</sup>-binding sites (Figure S3), occupancy of which increases the degree of structure in the C2 domain. This is consistent with published data demonstrating that C2 domain loops involved in Ca<sup>2+</sup> coordination adopt a more structured conformation in the presence of Ca<sup>2+</sup> (Shin et al., 2010). To further probe Ca<sup>2+</sup>-dependent

structural changes, we investigated thermal denaturation at constant ionic strength in the presence or absence of Ca<sup>2+</sup> using an Fc-fused form of J-1. Comparisons of thermal denaturation profiles for protein fragments with (J-1<sub>N-EGF3</sub>)/without the C2 domain (J-1<sub>ΔC2</sub>) are complex, but suggest that this domain unfolds first in an event that is separable from unfolding of the other domains (Figure S4). Subsequent fitting of the first unfolding event using a Boltzmann sigmoidal model allows derivation of the temperature at the midpoint, or T<sub>m</sub>. This first melt T<sub>m</sub> is significantly shifted to higher temperatures (Figures 2A and 2B) in the presence of calcium for J-1<sub>N-EGF3</sub>, but not for J-1<sub>ΔC2</sub>, providing strong evidence of a Ca<sup>2+</sup>-dependent increase in structure (shown by the increased heat required to induce unfolding). Since sequence comparisons implied conservation of the C2 domain in other Notch ligands (Figure 1D), we repeated these assays with human Delta-like 1 (Dll-1, 35% identity in the C2 domain) and found that Dll-1<sub>N-EGF3</sub> also demonstrated a calcium-dependent shift in the first melt T<sub>m</sub>, whereas Dll-1<sub>ΔC2</sub> did not. These data support the idea that the C2 domain is also present in Dll-1, as suggested by sequence alignments, and binds Ca<sup>2+</sup> despite the high level of sequence variation in the putative calcium-binding loops, which makes it difficult to predict which residues are likely to coordinate the metal ion.

We then sought to establish whether the Jagged C2 domain is functionally active as a phospholipid-binding domain. We used both solution- and plate-based assays to study protein binding to fluorescently labeled liposomes consisting of mixtures of phosphatidylcholine/phosphatidylserine/phosphatidylethanolamine (PC/PS/PE). These assays demonstrated that the J-1<sub>N-EGF3</sub>, but not the J-1<sub>ΔC2</sub>, construct bound liposomes in a Ca<sup>2+</sup>-dependent manner (Figures 2C and S5), supporting our structure-based hypothesis that the C2 domain at the N terminus of Jagged-1 is a functional phospholipid-recognition domain under physiological conditions. Human Dll-1 and *Drosophila* Serrate (40% identity in the C2 domain) were also investigated and were found to bind liposomes in a Ca<sup>2+</sup>- and C2-domain-dependent fashion (Figure 2C). However, as expected from sequence diversity in the ligand-binding loops, a comparative analysis of these three ligand constructs showed different levels of liposome binding (Figure 2D).

To further dissect the functional consequences of phospholipid recognition, we designed a series of site-directed J-1<sub>N-EGF3</sub> mutants targeting aspartate residues within the loops homologous to those involved in Ca<sup>2+</sup> and phospholipid binding in Munc13-1 C2b (Shin et al., 2010; Figure 1D). Structural and sequence comparisons suggested that aspartate residues in the β5-β6 loop (D140 and D144) were most likely involved in Ca<sup>2+</sup> coordination (located in structurally equivalent positions to residues D757 and D759 in the Munc13-1 C2b domain and conserved through human Notch-ligand proteins). However, we could not rule out the possible involvement of aspartates in the β1-β2 loop, which are less conserved through human Notch-ligand proteins. We therefore cloned and expressed single and double mutants of J-1<sub>N-EGF3</sub> with alanine substitutions in place of aspartates in the β5-β6 loop. Many of these mutations led to reduced protein stability and could not be further studied; however, the D140A/D144A double mutation within the β5-β6 loop was compatible with production of stable protein. Analysis

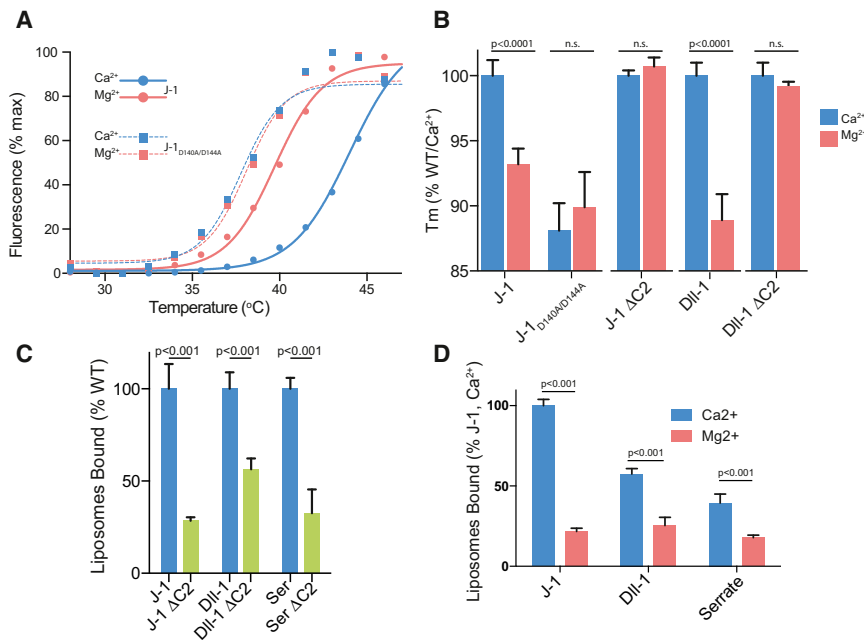

**Figure 2. Notch Ligands Contain a Functional Ca<sup>2+</sup>-Dependent Phospholipid Domain at Their N Termini**

(A) Representative Thermofluor thermal denaturation curves reveal that WT J-1<sub>N-EGF3-Fc</sub> shows a shift in T<sub>m</sub> to a higher temperature in the presence of 2 mM CaCl<sub>2</sub> (blue), but not 2 mM MgCl<sub>2</sub> (pink). This shift is not seen in the D140A/D144A double mutant. Error bars are ± SD.

(B) Notch-ligand proteins containing a WT C2 domain show a calcium-dependent shift in T<sub>m</sub>, whereas the D140A/D144A J-1 mutant or ΔC2 domain ligands do not. T<sub>m</sub> values were extracted from thermal denaturation data using a Boltzmann sigmoidal fit. Means and SDs for five (J-1) or three (Dll-1) independent repeats are reported.

(C) Plate-based assays (see [Experimental Procedures](#)) show that N-EGF3 constructs of three diverse Notch ligands (J-1, Dll-1, and *Drosophila* Serrate) all bind liposomes made from a PC/PS/PE mixture, whereas ΔC2 domain ligands do not.

(D) Using the same assay, all three ligands are Ca<sup>2+</sup> dependent in liposome binding, but they differ in their affinity for liposomes of a constant composition.

See also [Figures S3–S5](#).

by tryptic digestion ([Figure S3](#)) and thermal denaturation ([Figures 2A](#) and [2B](#)) assays demonstrated that this mutant has lost the ability to bind calcium at the concentrations used in our functional assays.

We next investigated whether the J-1 D140A/D144A substitutions affected Notch activation. An ELISA-based Notch-binding assay first demonstrated that this double mutant was competent for Notch-1 binding, in contrast to a previously identified ablative DSL domain mutant (F207A) control ([Figures 3A](#) and [3B](#)). By contrast, F207A was wild-type (WT)-like in its ability to bind liposomes, while D140A/D144A showed significantly reduced liposome binding ([Figures 3C](#) and [S5](#)) close to the background level of binding seen in a ΔC2 construct. We next used a quantitative split luciferase Notch activation reporter system ([Figure 3D](#)) in which Notch-1 was expressed on the cell surface and Fc fusions of Jagged-1 were presented on the well surface (to mimic Notch-ligand interactions *in trans*). This assay was chosen because it utilizes a receptor-proximal reporter whose output is directly proportional to the amount of NICD that is released ([Ilagan et al., 2011](#)), and thus is well suited for quantifying the extent of a deficit caused by ligand mutations. Wild-type J-1<sub>N-EGF3</sub> was able to promote Notch activation in this assay, whereas the F207A mutant, which cannot bind Notch, was strongly impaired. Importantly, the double mutant D140A/D144A ablated Notch-dependent activation to a level similar to that observed for F207A, even though this mutant is competent for Notch-1 binding *in vitro*.

To explore the molecular basis of the effects of this double mutant, we determined the J-1<sub>N-EGF3</sub> structure from crystals grown at a physiological pH in the presence of 7.5 mM Ca<sup>2+</sup> ([Table 1](#)). These crystals contain two independent copies of J-1<sub>N-EGF3</sub>, and, as observed for other Ca<sup>2+</sup>-dependent C2 domains, Ca<sup>2+</sup> is seen to bind in a cleft between the β1-β2 and β5-β6 loops at the top of the C2 domain ([Figures 3E](#) and [S1](#)),

ordering them despite the increased length of these loops in Jagged-1 compared with other C2 domains. Both copies of the molecule bind a single Ca<sup>2+</sup> ion, coordinated by the side chains of Asp72 (OD1) and Asp140 (OD1 and OD2) and the main-chain carbonyl of Ser141 ([Figure 3E](#), inset). The observed bidentate coordination of the bound Ca<sup>2+</sup> by Asp140 suggests that it is substitution of this side chain by Ala in the D140A/D144A mutant that explains the loss of Ca<sup>2+</sup> binding as shown by increased proteolytic susceptibility, reduced T<sub>m</sub>, and significantly reduced phospholipid binding. It is noteworthy that even in the presence of Ca<sup>2+</sup> at concentrations that our thermal denaturation assay suggests would be fully saturating ([Figure S4](#)), the β5-β6 and β1-β2 loops remain highly mobile, with their conformations varying between the two crystallographically independent copies of the molecule ([Figure S1](#)). This variation in loop structure leads to differences in how the Ca<sup>2+</sup> coordination shell is completed in these independent copies, and therefore we cannot exclude the possibility that a further rearrangement of the β5-β6 loop leads Asp144 to be directly or indirectly (via Ca<sup>2+</sup> coordination) involved in phospholipid binding.

## DISCUSSION

Collectively, our molecular and cellular data strongly imply that in addition to the Notch-1/Jagged-1 *trans* interaction, signaling may also require Ca<sup>2+</sup>-dependent phospholipid binding by Jagged-1. Our experimental data demonstrating that this activity is found in other Notch ligands ([Figure 2](#)), together with the observed sequence conservation ([Figure 1](#)), further suggest that all Notch signaling will have a lipid-binding element. It is of interest that three disease-causing mutations associated with extrahepatic biliary atresia map to the loop structures of the C2 domain ([Figure S1](#)) rather than to the hydrophobic core typical

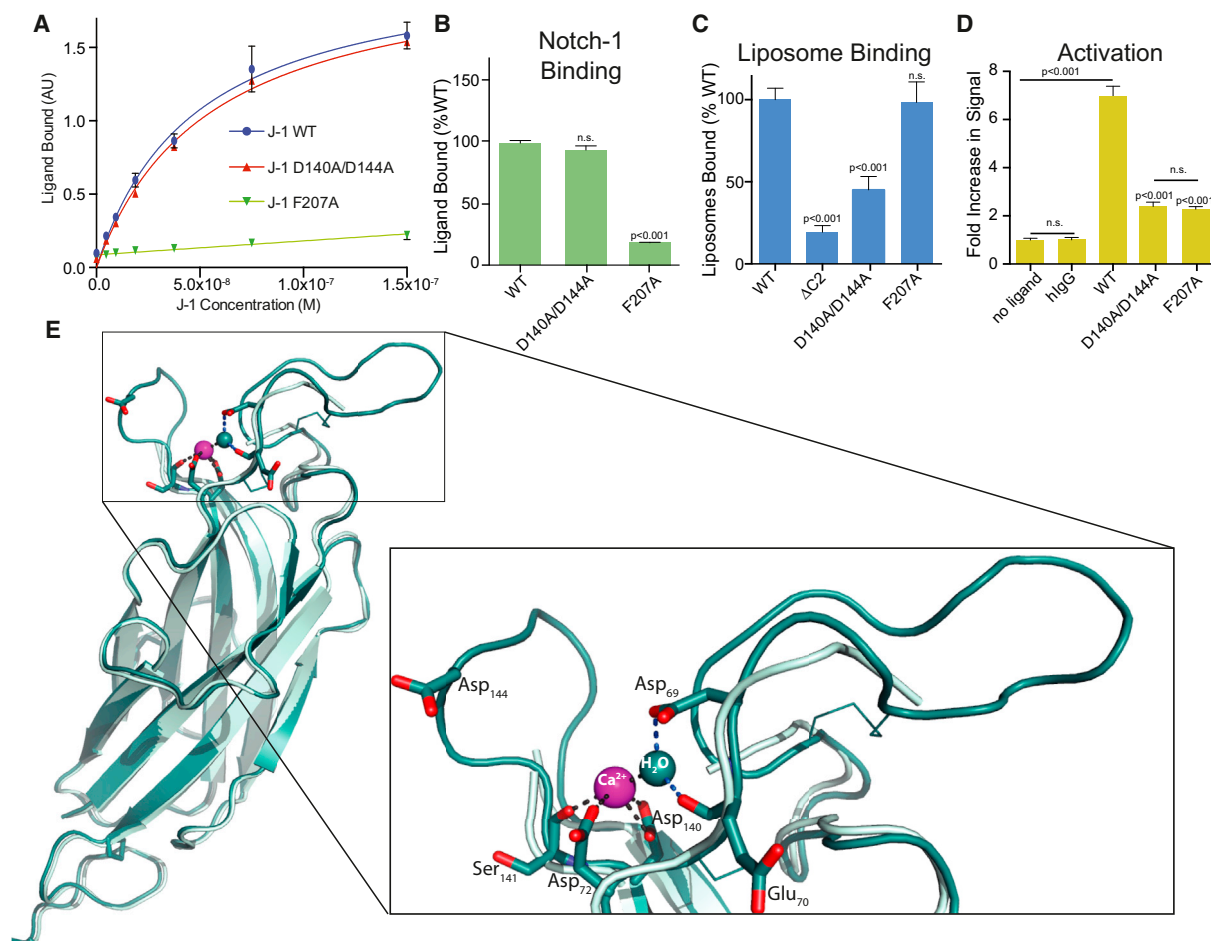

**Figure 3. Mutation of Residues within the  $\beta$ 5- $\beta$ 6 Loop of the Jagged-1 C2 Domain Leaves Notch Binding Intact but Disturbs Phospholipid Binding and Notch Activation**

(A and B) Notch-1 binding of WT J-1<sub>N-EGF3</sub> and mutants assessed by ELISA. Substitution F207A (within the Notch binding face of the DSL domain; Cordle et al., 2008a) reduces binding to background levels, whereas D140A/D144A double substitution in the  $\beta$ 5- $\beta$ 6 loop leaves binding intact.

(C) Liposome binding by WT J-1<sub>N-EGF3</sub> and mutants assessed using fluorescently labeled liposomes (PC/PE/PS).

(D) The ability of WT J-1<sub>N-EGF3</sub> F207A control and the D140A/D144A mutant to activate receptor in Notch1-transfected cells was assessed using a split luciferase reporter system.

(E) Structure of WT J-1<sub>N-EGF3</sub> at pH 7.5 in the presence of 7.5 mM Ca<sup>2+</sup> reveals a single calcium coordinated between the  $\beta$ 5- $\beta$ 6 and  $\beta$ 1- $\beta$ 2 loops. J-1 is shown as a cartoon representation (cyan, apo structure; teal, Ca<sup>2+</sup>-bound form copy A) with key residues highlighted as stick representations and the bound Ca<sup>2+</sup> (pink) and a water molecule (teal) involved in coordination shown as spheres. Note the bidentate coordination by D140, which explains the loss of Ca<sup>2+</sup> dependence associated with the D140A/D144A double mutant.

All error bars are  $\pm$  SD. See also Figures S1 and S5.

of Alagille syndrome mutations, emphasizing the importance of this region for function.

Notch-dependent signaling is a complex phenomenon involving a series of extra- and intracellular events that are required for signal generation under tightly controlled circumstances. Additional complexity was recently added to the Notch signaling pathway when a Notch ligand, Jagged-1, was demonstrated to interact with and be sequestered from productive Notch interactions by another cell-surface protein, CD46 (Le Friec et al., 2012). Our structural and functional data now add another component to this complex pathway, suggesting that C2-domain-mediated lipid binding is a modulator of the signaling process. Much further work will be required to dissect this

biology. It is unlikely that the generic phospholipids we used to assay binding are the functionally critical ones for Jagged-1, and indeed an earlier genetic study implicated glycosphingolipids in modulating ligand activity in *Drosophila* (Hamel et al., 2010). Furthermore, the lack of conservation among the loop residues within the ligand C2 domains implies that although they are all likely to be lipid-binding domains, they are likely to vary in their affinity or specificity for different lipids. The structural similarities to C2 domains involved in synaptic exocytosis, where, in addition to the Ca<sup>2+</sup>-dependent phospholipid-binding site, there is also a second site located on the surface of strands  $\beta$ 3 and  $\beta$ 4 (the cationic  $\beta$ -groove) that putatively allows these domains to play roles in membrane penetration and/or orientation of

proteins relative to the membrane are intriguing (Cho and Staehelin, 2006). Whether or not a second binding site exists within the Notch-ligand C2 domains remains an open question (Cho and Staehelin, 2006). Identification of this unexpected but important component of Notch signaling therefore opens up many new avenues for future work on the involvement of lipid biochemistry, including the identification of functionally relevant lipids in ligand/receptor-presenting cells, and characterization of potential roles of the C2 domain in Notch-ligand biology.

## EXPERIMENTAL PROCEDURES

### Protein Production

Jagged and Notch proteins were produced in human embryonic kidney 293T (HEK293T) cells using a transient transfection system (Aricescu et al., 2006). Proteins secreted into the medium were purified using Ni-chelating sepharose followed by gel filtration. Protein used for crystallization was produced in 293S GnTI<sup>-/-</sup> cells, which have been shown to lack complex N-glycosylation and thus improve the homogeneity of the protein.

### Notch Binding Assay

For the Notch binding assay, 200 ng of human Notch-1<sub>N-EGF14</sub> was coated overnight at 4°C per well of a MaxiSorp plate. Wells were blocked using 2% gelatin, 1% milk in Tris-buffered saline with Tween 20 (TBS-T). WT and mutant Fc-tagged constructs of J-1<sub>N-EGF3</sub> were added at the required concentrations (100 nM in general) and antihuman immunoglobulin G Fc antibody-horseradish peroxidase conjugate (Sigma) was used to detect binding.

### Thermofluor Thermal Denaturation Assay

Thermofluor thermal denaturation assays were performed to measure Ca<sup>2+</sup>-induced structural changes (Jakobi et al., 2011) in 50 mM Tris-HCl (pH 7.5), 200 mM NaCl with 2 mM Ca<sup>2+</sup>/Mg<sup>2+</sup> (J-1 assays), or 10 mM Ca<sup>2+</sup>/Mg<sup>2+</sup> (DLL-1 assays) with ~200 μg Notch ligand proteins as Fc fusions per well, using Sypro Orange (Sigma-Aldrich) at a dilution of ~1:300. Assays were performed on a Stratagene Mx3005P using steps of 1.5°C over 90 s from 25°C to 77.5°C for the number of repeats specified. All data were normalized and fit using a Boltzmann sigmoidal function in GraphPad Prism 6.0 to extract T<sub>m</sub> values.

### Limited Proteolysis Assay

For limited proteolysis assays, 10 μg of WT and mutant histidine-tagged J-1<sub>N-EGF3</sub> proteins were treated with trypsin (protein:trypsin 50:1) in the presence of 10 mM Ca<sup>2+</sup>/Mg<sup>2+</sup> or EDTA in 50 mM Tris pH 7.5, 200 mM NaCl buffer. Reactions were incubated at 37°C and samples were collected at different time intervals and analyzed by SDS-PAGE.

### Phospholipid Binding Assay

Liposomes were prepared using PC/PS/PE-fluorescein (80:15:5) by ultrasonication/extrusion. The bead-based assay was performed using 10 μl of Protein A-sepharose beads immobilized with 10 μg of Fc-fused protein per reaction. Beads were incubated for 30 min with 1 μM phospholipids in 20 mM HEPES pH 7.5, 200 mM NaCl containing 2 mM Ca<sup>2+</sup>/Mg<sup>2+</sup>/EDTA. In the high-throughput plate-based assay, equimolar concentrations of proteins (400 nM) were coated on a MaxiSorp plate. After blocking with 1% gelatin, 100 μM of phospholipids was added in the presence of 2 mM free Ca<sup>2+</sup>/Mg<sup>2+</sup> or 0.5 mM EGTA. In both methods, after washing with relevant buffers, bound liposomes were solubilized with 0.3% Triton X-100 and fluorescence was measured using a NanoDrop 3300.

### Crystallization and Structure Solution

Crystals for the 2.5 Å apo structure were grown in 0.3 μl sitting drops using vapor diffusion at 3.2 mg/ml with 0.97 M sodium citrate (pH 5.0), 19.4% polyethylene glycol 6000 mother liquor at 25% after initial screening using commercially available reagents from Molecular Dimensions. Diffraction data were collected at the ESRF on beamline ID29 with a Pilatus 6M-F detector. The structure was solved by molecular replacement using the program Phaser

and the previously published structure of Jagged<sup>1</sup><sub>DSL-EGF123</sub> (Cordle et al., 2008a; McCoy et al., 2007). The C2 domain was modeled using a combination of autobuild, buccaneer, and manual modeling (Adams et al., 2010; Cowtan, 2006).

Both calcium-bound forms were crystallized at 5.0 mg/ml with commercial reagents from Molecular Dimensions using the sitting-drop vapor-diffusion method with a drop size of 0.2 μl and 25% mother liquor. The 2.38 Å form was crystallized with 0.2 M sodium acetate, 0.1 M Bis-Tris propane (pH 7.5), and 20% polyethylene glycol 3350. The 2.84 Å form was crystallized using 0.2 M sodium iodide, 0.1 M Bis-Tris propane (pH 6.5), and 20% polyethylene glycol 3350. In addition, 10 mM CaCl<sub>2</sub> was added to the initial protein solution, and the final concentration in the drop was 7.5 mM. Data were collected at the Diamond Synchrotron facility on beamline I03 with a Pilatus 6M-F detector. Phases were determined by molecular replacement using the apo structure and the program Phaser. Refinement for all structures was performed using autobuster and COOT (Emsley et al., 2010; Smart et al., 2012). The density for the newly ordered loops is shown in Figure S1 prior to rebuilding. Data refinement and model statistics are summarized in Table 1.

### Notch Activation Assays

Purified J-1<sub>N-EGF3</sub> Fc-fusion proteins (10 μg/ml in TBS) were immobilized on culture plates overnight at 4°C. The plates were washed once with TBS and then the Notch split luciferase reporter cells (HelaTetON cells stably expressing Notch1-NLuc and CLuc-RBPjk) were seeded onto the immobilized ligand in the presence of 0.5 μg/ml doxycycline to induce reporter expression. After 24 hr, the cells were assayed for bioluminescence as previously described (Ilagan et al., 2011).

### ACCESSION NUMBERS

Coordinates and X-ray data sets have been deposited in the Protein Data Bank under accession numbers 4CC0, 4CC1, and 4CBZ.

### SUPPLEMENTAL INFORMATION

Supplemental Information includes five figures and can be found with this article online at <http://dx.doi.org/10.1016/j.celrep.2013.10.029>.

### ACKNOWLEDGMENTS

We thank Nancy Spinner for generous access to her human Jagged-1 mutation database and the referees for their helpful comments on the manuscript. D.S. and C.R.C. were funded by Wellcome Trust grant 087928 awarded to P.A.H. and S.M.L. Work in S.M.L.'s lab is supported by a Wellcome Senior Investigator Award (100298). We thank David Staunton of the Molecular Biophysics Suite for help with Thermofluor assays.

Received: July 3, 2013

Revised: September 25, 2013

Accepted: October 17, 2013

Published: November 14, 2013

### REFERENCES

- Adams, P.D., Afonine, P.V., Bunkóczi, G., Chen, V.B., Davis, I.W., Echols, N., Headd, J.J., Hung, L.W., Kapral, G.J., Grosse-Kunstleve, R.W., et al. (2010). PHENIX: a comprehensive Python-based system for macromolecular structure solution. *Acta Crystallogr. D Biol. Crystallogr.* 66, 213–221.
- Aricescu, A.R., Lu, W., and Jones, E.Y. (2006). A time- and cost-efficient system for high-level protein production in mammalian cells. *Acta Crystallogr. D Biol. Crystallogr.* 62, 1243–1250.
- Bray, S.J. (2006). Notch signalling: a simple pathway becomes complex. *Nat. Rev. Mol. Cell Biol.* 7, 678–689.
- Chillakuri, C.R., Sheppard, D., Lea, S.M., and Handford, P.A. (2012). Notch receptor-ligand binding and activation: insights from molecular studies. *Semin. Cell Dev. Biol.* 23, 421–428.

- Cho, W., and Stahelin, R.V. (2006). Membrane binding and subcellular targeting of C2 domains. *Biochim. Biophys. Acta* 1761, 838–849.
- Cordle, J., Johnson, S., Tay, J.Z., Roversi, P., Wilkin, M.B., de Madrid, B.H., Shimizu, H., Jensen, S., Whiteman, P., Jin, B., et al. (2008a). A conserved face of the Jagged/Serrate DSL domain is involved in Notch trans-activation and cis-inhibition. *Nat. Struct. Mol. Biol.* 15, 849–857.
- Cordle, J., Redfieldz, C., Stacey, M., van der Merwe, P.A., Willis, A.C., Champion, B.R., Hambleton, S., and Handford, P.A. (2008b). Localization of the delta-like-1-binding site in human Notch-1 and its modulation by calcium affinity. *J. Biol. Chem.* 283, 11785–11793.
- Cowtan, K. (2006). The Buccaneer software for automated model building. 1. Tracing protein chains. *Acta Crystallogr. D Biol. Crystallogr.* 62, 1002–1011.
- Emsley, P., Lohkamp, B., Scott, W.G., and Cowtan, K. (2010). Features and development of Coot. *Acta Crystallogr. D Biol. Crystallogr.* 66, 486–501.
- Gordon, W.R., Arnett, K.L., and Blacklow, S.C. (2008). The molecular logic of Notch signaling—a structural and biochemical perspective. *J. Cell Sci.* 121, 3109–3119.
- Groth, C., and Fortini, M.E. (2012). Therapeutic approaches to modulating Notch signaling: current challenges and future prospects. *Semin. Cell Dev. Biol.* 23, 465–472.
- Hamel, S., Fantini, J., and Schweisguth, F. (2010). Notch ligand activity is modulated by glycosphingolipid membrane composition in *Drosophila melanogaster*. *J. Cell Biol.* 188, 581–594.
- Harper, J.A., Yuan, J.S., Tan, J.B., Visan, I., and Guidos, C.J. (2003). Notch signaling in development and disease. *Clin. Genet.* 64, 461–472.
- Henderson, S.T., Gao, D., Christensen, S., and Kimble, J. (1997). Functional domains of LAG-2, a putative signaling ligand for LIN-12 and GLP-1 receptors in *Caenorhabditis elegans*. *Mol. Biol. Cell* 8, 1751–1762.
- Ilagan, M.X., Lim, S., Fulbright, M., Piwnica-Worms, D., and Kopan, R. (2011). Real-time imaging of notch activation with a luciferase complementation-based reporter. *Sci. Signal.* 4, rs7.
- Jakobi, A.J., Mashaghi, A., Tans, S.J., and Huizinga, E.G. (2011). Calcium modulates force sensing by the von Willebrand factor A2 domain. *Nat. Commun.* 2, 385.
- Le Friec, G., Sheppard, D., Whiteman, P., Karsten, C.M., Shamoun, S.A., Laing, A., Bugeon, L., Dallman, M.J., Melchionna, T., Chillakuri, C., et al. (2012). The CD46-Jagged1 interaction is critical for human TH1 immunity. *Nat. Immunol.* 13, 1213–1221.
- McCoy, A.J., Grosse-Kunstleve, R.W., Adams, P.D., Winn, M.D., Storoni, L.C., and Read, R.J. (2007). Phaser crystallographic software. *J. Appl. Cryst.* 40, 658–674.
- Penton, A.L., Leonard, L.D., and Spinner, N.B. (2012). Notch signaling in human development and disease. *Semin. Cell Dev. Biol.* 23, 450–457.
- Shin, O.H., Lu, J., Rhee, J.S., Tomchick, D.R., Pang, Z.P., Wojcik, S.M., Camacho-Perez, M., Brose, N., Machius, M., Rizo, J., et al. (2010). Munc13 C2B domain is an activity-dependent Ca<sup>2+</sup> regulator of synaptic exocytosis. *Nat. Struct. Mol. Biol.* 17, 280–288.
- Smart, O.S., Womack, T.O., Flensburg, C., Keller, P., Paciorek, W., Sharff, A., Vonrhein, C., and Bricogne, G. (2012). Exploiting structure similarity in refinement: automated NCS and target-structure restraints in BUSTER. *Acta Crystallogr. D Biol. Crystallogr.* 68, 368–380.
- Sprinzak, D., Lakhnopal, A., Lebon, L., Santat, L.A., Fontes, M.E., Anderson, G.A., Garcia-Ojalvo, J., and Elowitz, M.B. (2010). Cis-interactions between Notch and Delta generate mutually exclusive signalling states. *Nature* 465, 86–90.
- Stanley, P., and Okajima, T. (2010). Roles of glycosylation in Notch signaling. *Curr. Top. Dev. Biol.* 92, 131–164.
- Whiteman, P., de Madrid, B.H., Taylor, P., Li, D., Heslop, R., Viticheep, N., Tan, J.Z., Shimizu, H., Callaghan, J., Masiero, M., et al. (2013). Molecular basis for Jagged-1/Serrate ligand recognition by the Notch receptor. *J. Biol. Chem.* 288, 7305–7312.

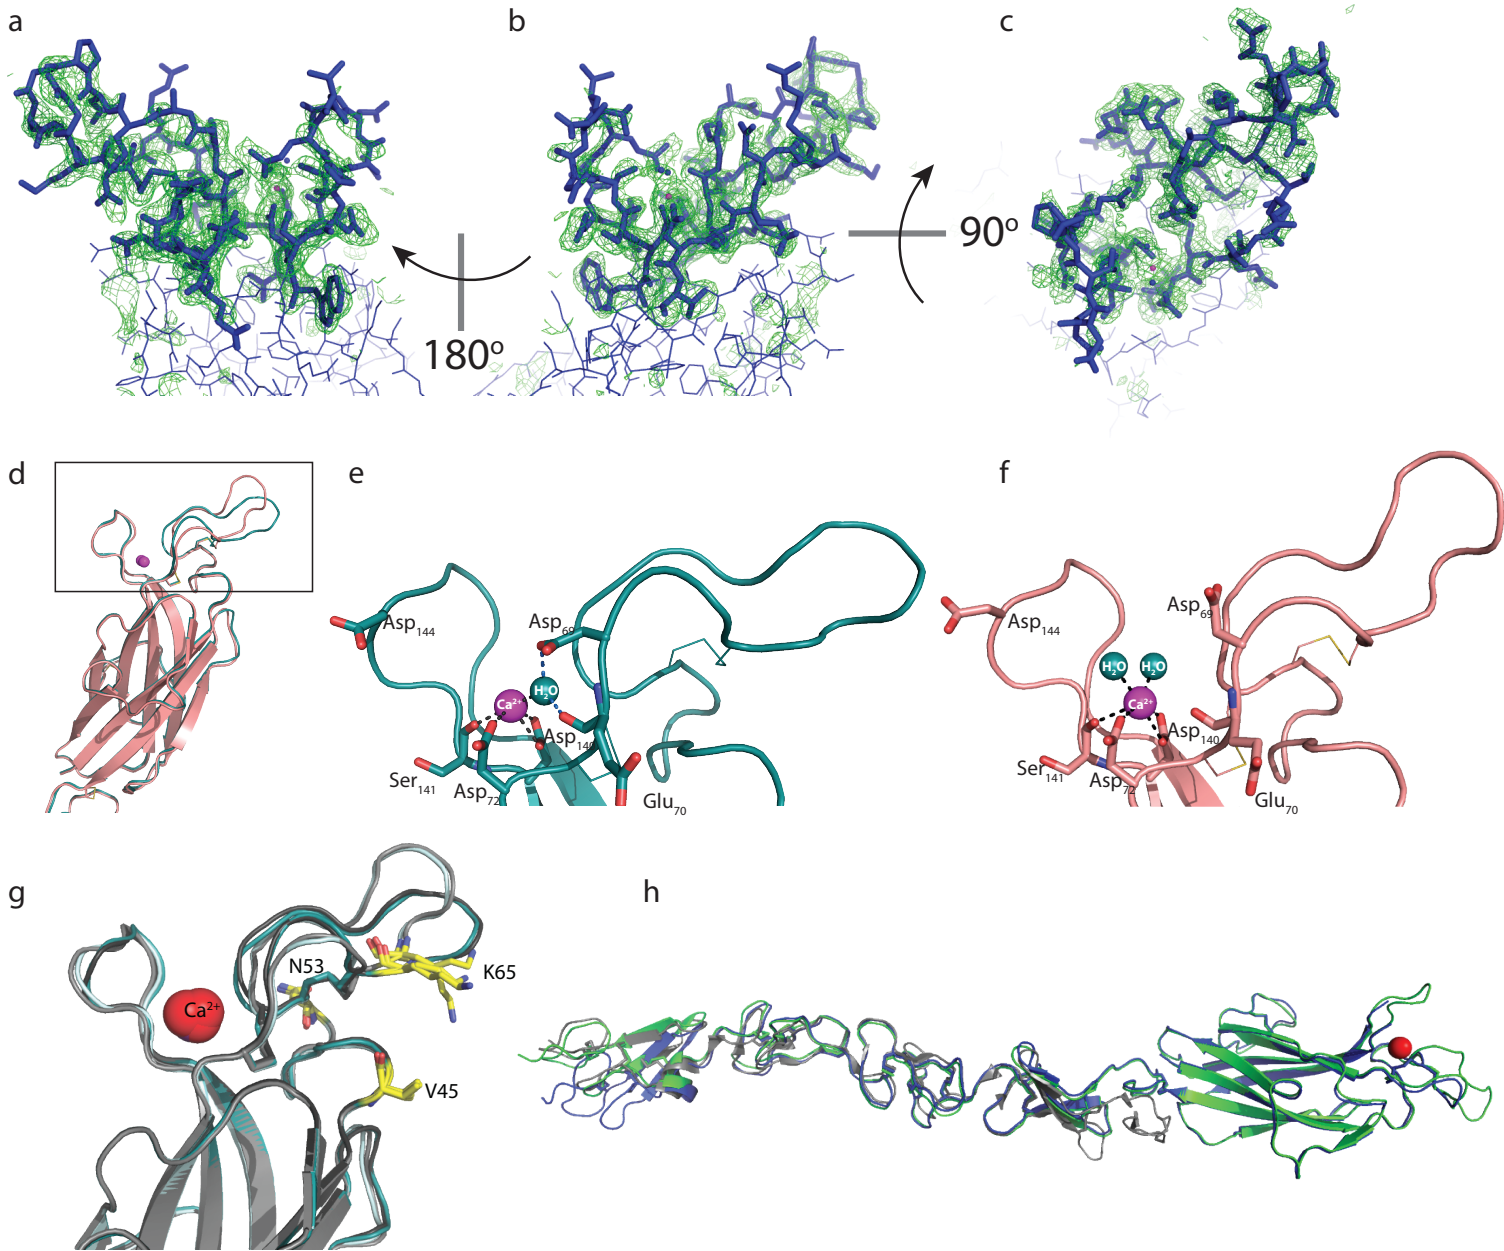

**Supplemental Figure 1 related to Figures 1 and 3. Structural validation, detailed views and comparisons.**

(a-c)  $|F_o| - |F_c|$ ,  $\alpha C$  map calculated using the model prior to first building residues B59-73, B139-150, the bound  $Ca^{2+}$  and associated waters shows clear density for the loops at the tip of the C2 domain that were disordered in the apo structure.

(d-f) Overlay of the calcium binding sites in the two independent copies of  $J-1_{N-EGF3}$  (d) overview of the C2 domain

overlay - boxed region corresponds to zoom regions shown in other panels (e) zoom of copy A (as shown in Figure 3) (f) zoom of copy B. Coordination by the side chains of Asp<sub>72</sub>, Asp<sub>140</sub> and main chain of Ser<sub>141</sub> are conserved between both molecules. Other details differ primarily due to rearrangement of the  $\beta 1$ - $\beta 2$  loop.

(g) Overlay of the DSL-distal surface of the Jagged-1 C2 domains from the four unique chains built in two different crystal forms (light/dark grey cartoon 2.8A form; light/dark cyan cartoon 2.4A) all with  $Ca^{2+}$  bound. The residues highlighted as yellow side chains are those in which mutations associated with extrahepatic biliary atresia are found.

(h) Overlay of cartoon of representative chains from all structures of Jagged-1: grey  $J-1_{DSL-EGF3}$  (Cordle et al, NSMB, 2008); blue  $J-1_{N-EGF3}$  in the absence of  $Ca^{2+}$ ; green  $J-1_{N-EGF3}$  in the presence of  $Ca^{2+}$



a

| J1 mutation | Expression | Effect on protein          |
|-------------|------------|----------------------------|
| I152T       | Yes        | Misfolding<br>-ER retained |
| Y181N       | Yes        | Misfolding<br>-ER retained |
| R184H       | Yes        | Misfolding<br>-ER retained |

b

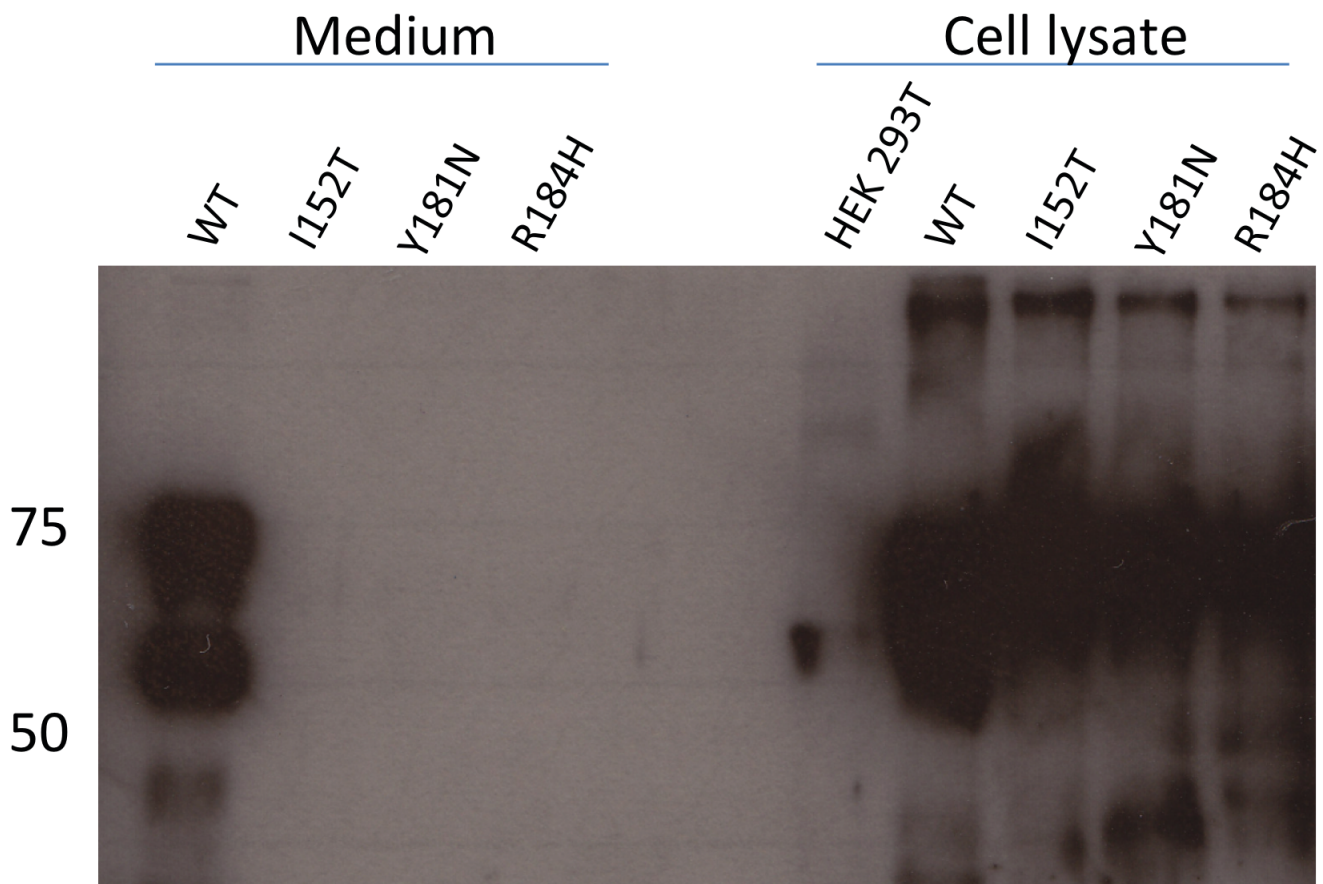

**Supplemental Figure 2 related to Figure 1.** Mutations associated with Alagille disease cause misfolding of Jagged-1 and its retention within the endoplasmic reticulum. (a) Alagille-mutations expressed and summary of the protein production phenotype (b) SDS-PAGE of extracellular medium and cell-lysate reveals that, with the exception of wild-type Jagged-1 which is secreted into the extracellular medium, the Alagille-associated mutations all result in retention of the protein expressed within the cell.

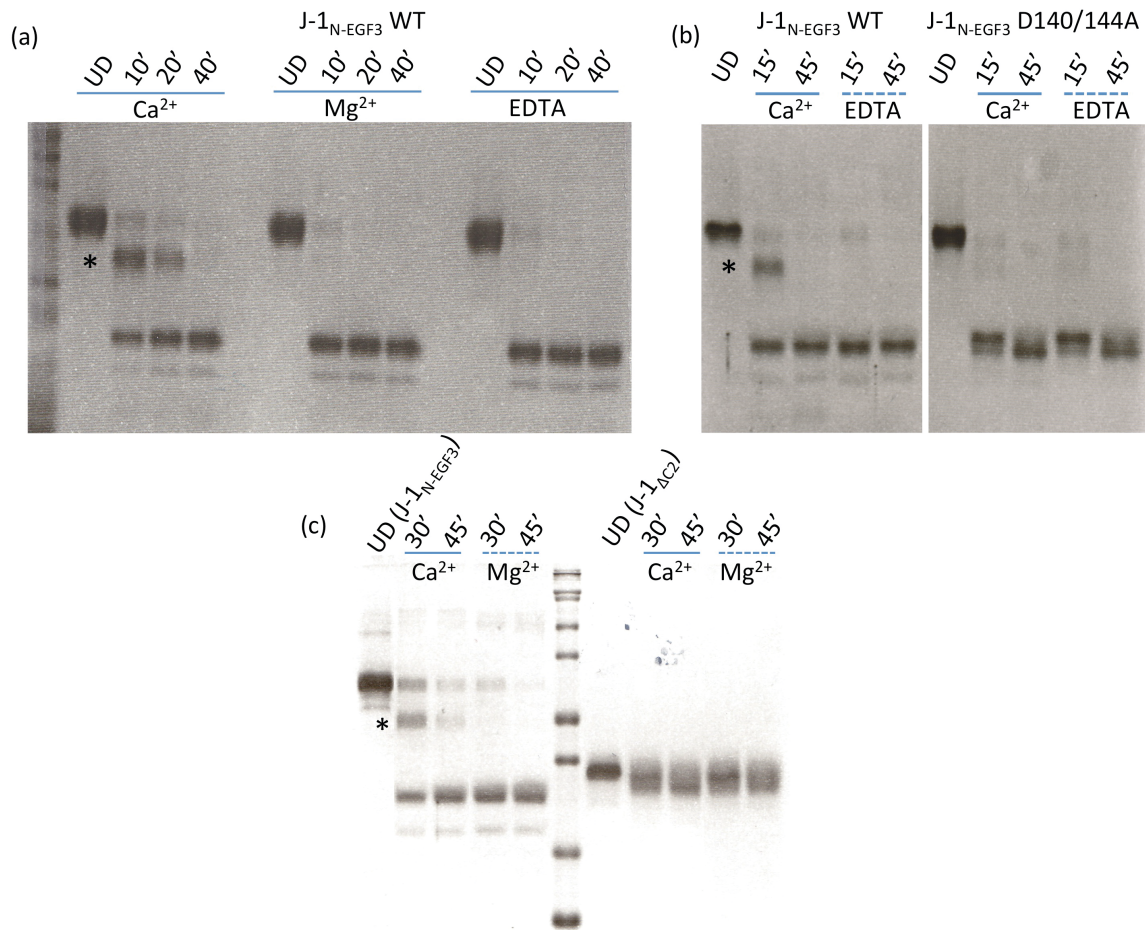

**Supplemental Figure 3 related to Figure 2.** Limited proteolysis of J-1 proteins. (a) J-1<sub>N-EGF3</sub> WT protein is protected against trypsin only in the presence of Ca<sup>2+</sup> and not Mg<sup>2+</sup> or EDTA. (b) Ca<sup>2+</sup> dependent protection is lost in the D140A/D144A mutant indicating loss of Ca<sup>2+</sup> binding. (c) only fragments with a C2 domain show this Ca<sup>2+</sup> dependent protection. UD=undigested, \* indicates the protected band.

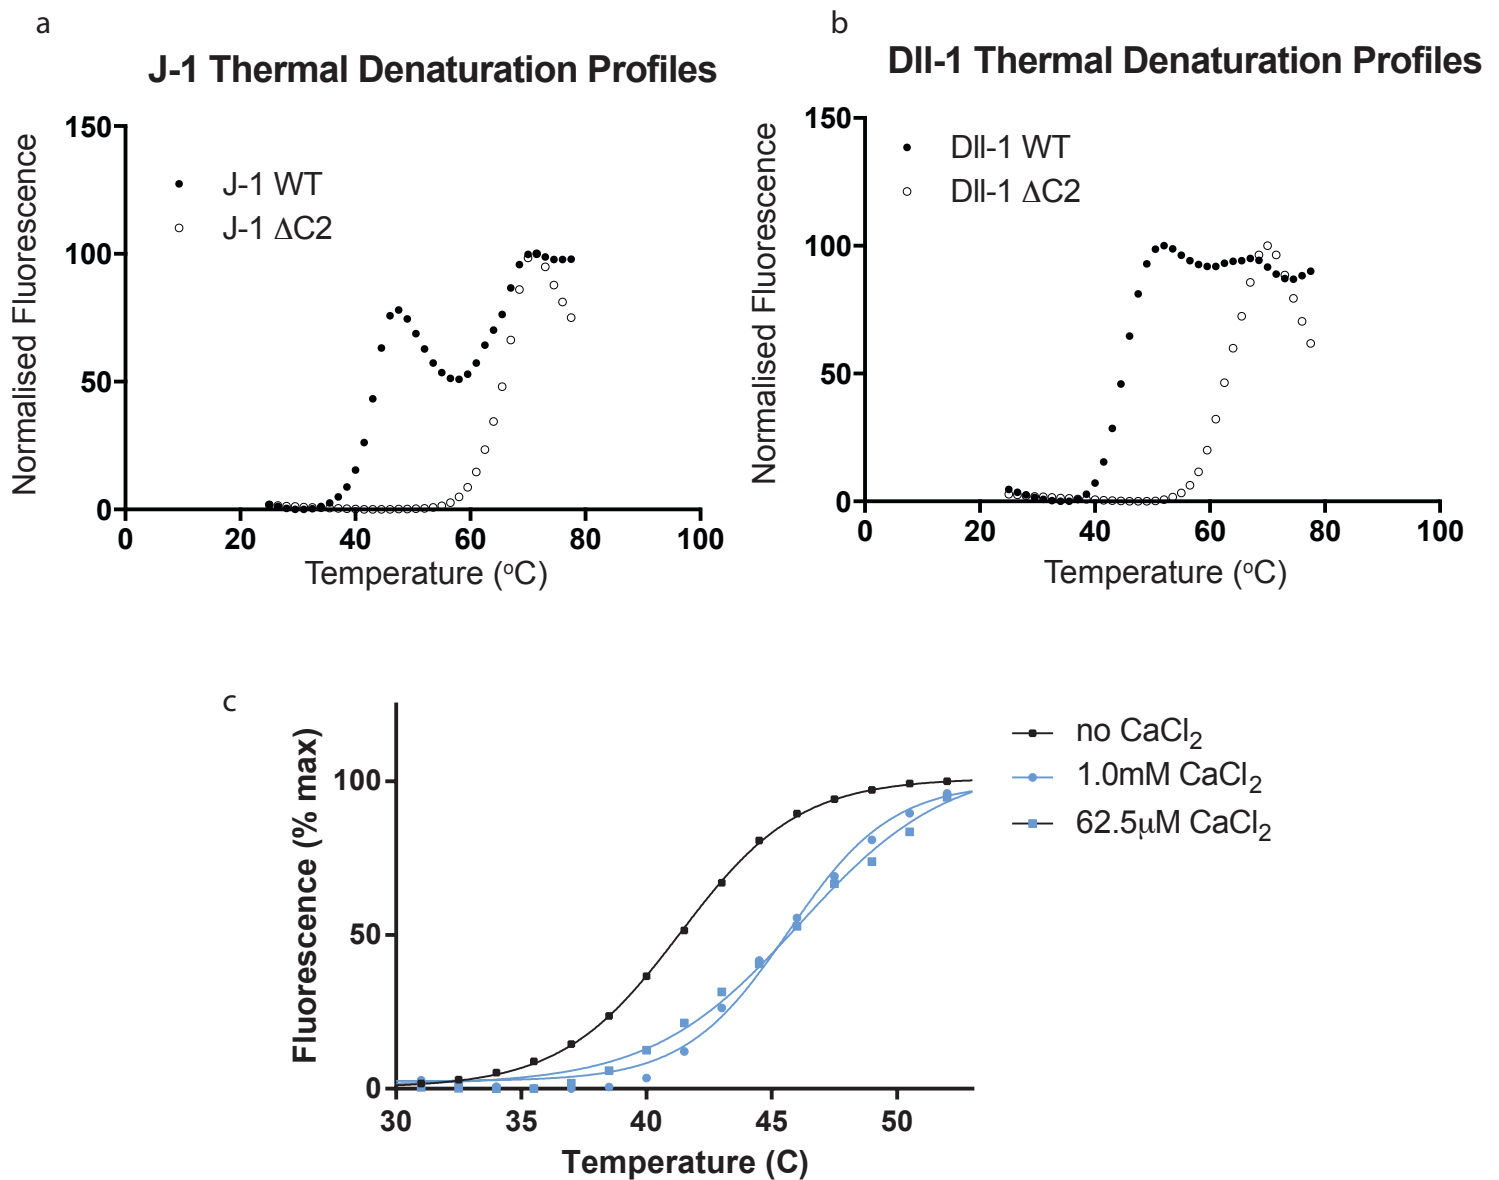

**Supplemental Figure 4 related to Figure 2.** Thermal denaturation profiles for Notch ligand protein constructs with and without the C2 domain (see methods) demonstrate that the C2 domain melts first and that the temperature of the first melt depends on the presences of Calcium (a) Profile for Jagged-1 with/without the C2 domain (b) profile for Delta-like 1 with/without the C2 domain (c) The temperature with which the C2 domain melts in Jagged-1 depends on the presence of Calcium with the shift to higher temperature occurring even at CaCl<sub>2</sub> concentrations as low as 62.5μM implying the affinity of the C2 domain for calcium is below this level.

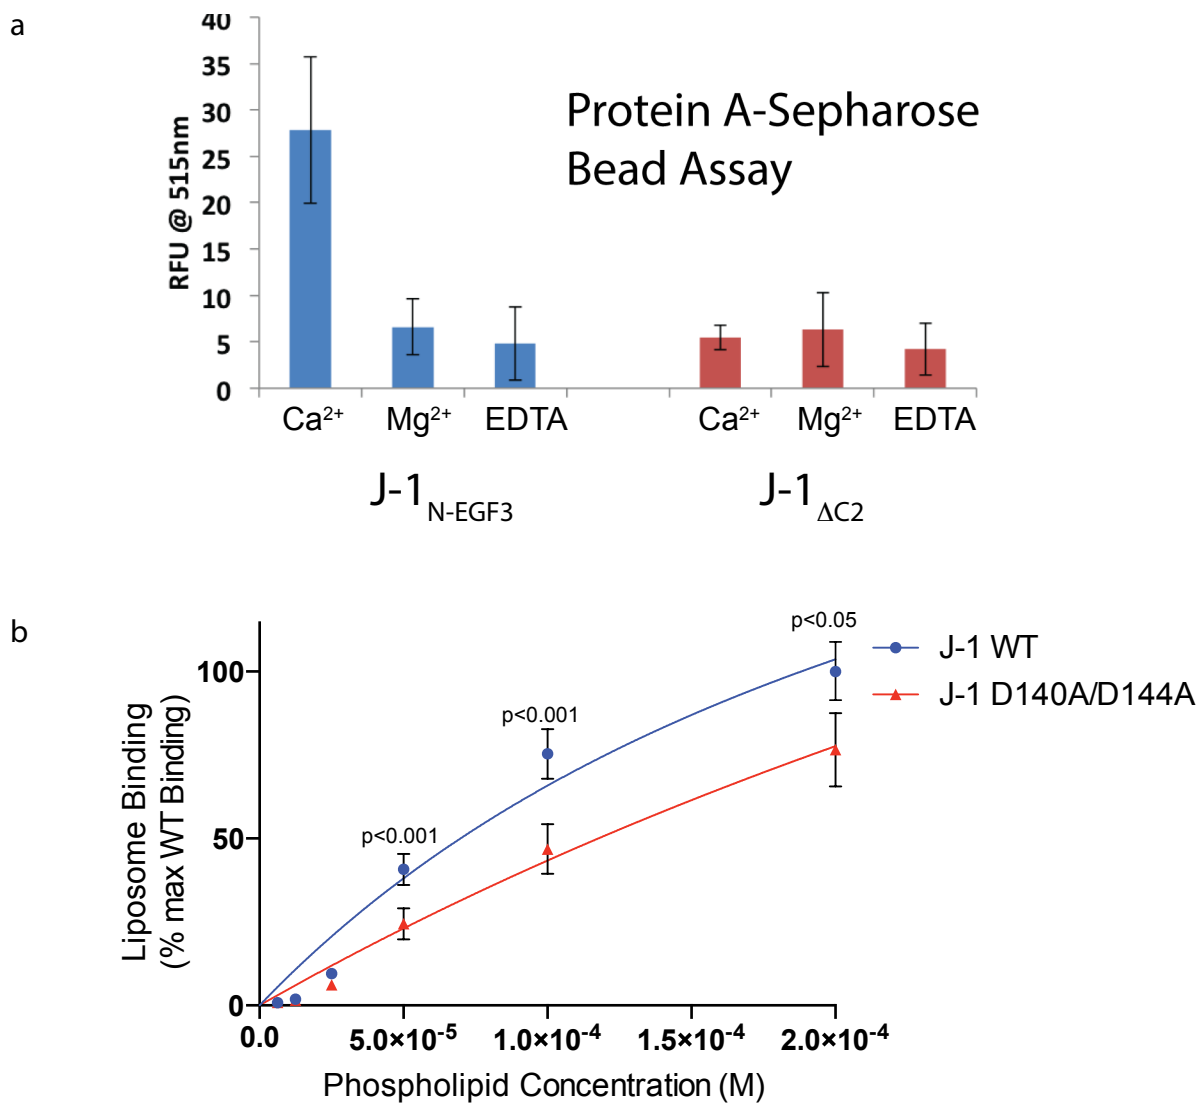

**Supplemental Figure 5 related to Figures 2 and 3.** Phospholipid binding by Jagged-1.

(a) J-1 fragments containing the C2 domain, but not those lacking the C2 domain show Ca<sup>2+</sup> dependent binding of liposomes using a bead-based assay (see methods). Data are shown as mean +/- standard deviation for n=5 independent repeats.

(b) Titration of Phospholipid Binding at constant Jagged-1 concentration using the plate based assay (see methods) demonstrates that the D140A/D144A is significantly reduced in its ability to bind liposomes at a range of phospholipid concentrations.
